# Supplementary material
Source: PubMed Central journal article supplement (PMC1226313)
Supplement: nar_33_16_5308__1.pdf [file nar_33_16_5308__1.pdf]

**Table 2.** Genes up-regulated in TNF- $\alpha$ -stimulated control HMEC-1/empty vector and down-regulated in stimulated HMEC-1/TD I $\kappa$ B $\alpha$

| Probe Set ID | Gene Title                                                                                         | Gene Symbol       | Acc No.     | HMEC-1/empty +TNF- $\alpha$<br>vs HMEC-1/empty -TNF- $\alpha$ . |      |            | HMEC-1/I $\kappa$ B $\alpha$ +TNF- $\alpha$<br>vs HMEC-1/empty+TNF- $\alpha$ . |      |             |
|--------------|----------------------------------------------------------------------------------------------------|-------------------|-------------|-----------------------------------------------------------------|------|------------|--------------------------------------------------------------------------------|------|-------------|
|              |                                                                                                    |                   |             | *SLR                                                            | sd   | Fold       | *SLR                                                                           | sd   | Fold        |
| 201762_s_a   | proteasome (prosome, macropain) activator subunit 2 (PA28 beta)                                    | PSME2             | NM_002818.1 | 1,12                                                            | 0,14 | <b>2,2</b> | -1,18                                                                          | 0,09 | <b>2,3</b>  |
| 202023_at    | ephrin-A1                                                                                          | EFNA1             | NM_004428.1 | 1,64                                                            | 0,23 | <b>3,1</b> | -1,78                                                                          | 0,27 | <b>3,4</b>  |
| 202376_at    | serine (or cysteine) proteinase inhibitor, clade A (alpha-1 antiproteinase, antitrypsin), member 3 | SERPINA3          | NM_001083.2 | 2,09                                                            | 0,56 | <b>4,3</b> | -2,65                                                                          | 0,88 | <b>6,3</b>  |
| 202531_at    | interferon regulatory factor 1                                                                     | IRF1              | NM_002198.1 | 1,36                                                            | 0,13 | <b>2,6</b> | -1,63                                                                          | 0,21 | <b>3,1</b>  |
| 202659_at    | proteasome (prosome, macropain) subunit, beta type, 10                                             | PSMB10            | NM_002801.1 | 1,67                                                            | 0,34 | <b>3,2</b> | -1,7                                                                           | 0,17 | <b>3,2</b>  |
| 203045_at    | ninjurin 1                                                                                         | NINJ1             | NM_004148.1 | 1,19                                                            | 0,41 | <b>2,3</b> | -1,39                                                                          | 0,33 | <b>2,6</b>  |
| 203821_at    | diphtheria toxin receptor (heparin-binding epidermal growth factor-like growth factor)             | DTR <sup>1</sup>  | NM_001945.1 | 1,32                                                            | 0,23 | <b>2,5</b> | -1,22                                                                          | 0,1  | <b>2,3</b>  |
| 204470_at    | chemokine (C-X-C motif) ligand 1                                                                   | CXCL1             | NM_001511.1 | 1,72                                                            | 0,19 | <b>3,3</b> | -3,88                                                                          | 0,14 | <b>14,7</b> |
| 204580_at    | matrix metalloproteinase 12 (macrophage elastase)                                                  | MMP12             | NM_002426.1 | 1,65                                                            | 0,15 | <b>3,1</b> | -1,62                                                                          | 0,19 | <b>3,1</b>  |
| 205180_s_at  | ta disintegrin and metalloproteinase domain 8                                                      | ADAM8             | NM_001109.1 | 2,64                                                            | 0,38 | <b>6,2</b> | -3,24                                                                          | 0,64 | <b>9,4</b>  |
| 205207_at    | interleukin 6 (interferon, beta 2)                                                                 | IL6               | NM_000600.1 | 1,68                                                            | 0,19 | <b>3,2</b> | -2,6                                                                           | 0,13 | <b>6,1</b>  |
| 205576_at    | serine (or cysteine) proteinase inhibitor, clade D (heparin cofactor), member 1                    | SERPIND1          | NM_000185.2 | 1,76                                                            | 1,12 | <b>3,4</b> | -1,48                                                                          | 0,26 | <b>2,8</b>  |
| 205680_at    | matrix metalloproteinase 10 (stromelysin 2)                                                        | MMP10             | NM_002425.1 | 3,27                                                            | 0,11 | <b>9,6</b> | -1,84                                                                          | 0,33 | <b>3,6</b>  |
| 207030_s_at  | cysteine and glycine-rich protein 2                                                                | CSRP2             | NM_001321.1 | 1,21                                                            | 0,26 | <b>2,3</b> | -1,39                                                                          | 0,28 | <b>2,6</b>  |
| 207442_at    | colony stimulating factor 3 (granulocyte)                                                          | CSF3              | NM_000759.1 | 2,29                                                            | 0,46 | <b>4,9</b> | -3,87                                                                          | 0,6  | <b>14,6</b> |
| 208394_x_at  | endothelial cell-specific molecule 1                                                               | ESM1              | NM_007036.2 | 1,22                                                            | 0,17 | <b>2,3</b> | -1,35                                                                          | 0,21 | <b>2,5</b>  |
| 209099_x_at  | jagged 1 (Alagille syndrome)                                                                       | JAG1              | U73936.1    | 1,28                                                            | 0,13 | <b>2,4</b> | -1,09                                                                          | 0,1  | <b>2,1</b>  |
| 210118_s_at  | interleukin 1, alpha                                                                               | IL1A              | M15329.1    | 1,21                                                            | 0,28 | <b>2,3</b> | -2,64                                                                          | 1,02 | <b>6,2</b>  |
| 210218_s_at  | nuclear antigen Sp100                                                                              | SP100             | U36501.1    | 1,2                                                             | 0,39 | <b>2,3</b> | -1,52                                                                          | 0,26 | <b>2,9</b>  |
| 210260_s_at  | tumor necrosis factor, alpha-induced protein 8                                                     | TNFAIP8           | BC005352.1  | 1,54                                                            | 0,33 | <b>2,9</b> | -1,39                                                                          | 0,24 | <b>2,6</b>  |
| 210689_at    | claudin 14                                                                                         | CLDN14            | AF314090.1  | 2,2                                                             | 0,35 | <b>4,6</b> | -1,61                                                                          | 0,21 | <b>3,1</b>  |
| 211075_s_at  | CD47 antigen (Rh-related antigen, integrin-associated signal transducer)                           | CD47 <sup>1</sup> | Z25521.1    | 1,19                                                            | 0,21 | <b>2,3</b> | -1,58                                                                          | 0,19 | <b>3,0</b>  |
| 211844_s_at  | neuropilin 2                                                                                       | NRP2              | AF022859.1  | 1,73                                                            | 0,74 | <b>3,3</b> | -1,75                                                                          | 0,5  | <b>3,4</b>  |
| 218541_s_at  | chromosome 8 open reading frame 4                                                                  | C8orf4            | NM_020130.1 | 1,64                                                            | 0,29 | <b>3,1</b> | -1,7                                                                           | 0,33 | <b>3,2</b>  |
| 218627_at    | hypothetical protein FLJ11259                                                                      | FLJ11259          | NM_018370.1 | 1,23                                                            | 0,08 | <b>2,3</b> | -1,64                                                                          | 0,1  | <b>3,1</b>  |
| 218834_s_at  | heat shock 70kDa protein 5 (glucose-regulated protein, 78kDa) binding protein 1                    | HSPA5BP1          | NM_017870.1 | 1,6                                                             | 0,36 | <b>3,0</b> | -2,36                                                                          | 0,35 | <b>5,1</b>  |
| 219584_at    | phospholipase A1 member A                                                                          | PLA1A             | NM_015900.1 | 2,33                                                            | 0,76 | <b>5,0</b> | -3,77                                                                          | 0,76 | <b>13,6</b> |

(Comparison HMEC-1/empty vector +TNF-a vs HMEC-1/ empty vector -TNF-a (Increase) and HMEC-1/I $\kappa$ B $\alpha$  +TNF-a vs HMEC-1/empty vector + TNF-a (Decrease) less HMEC-1/IKK2 -TNF-a vs HMEC-1/empty vector - TNF-a (Increase) ).

\* SLR: signal log ratio (mean of three independent hybridization experiments).

<sup>1</sup> Gene with more than one hit on the genechip

**Table 3.** Genes up-regulated in TNF- $\alpha$ -stimulated control HMEC-1/empty vector and in unstimulated HMEC-1/CA IKK2.

| Probe Set ID | Gene Title                                                                          | Gene Symbol | Acc No.  | HMEC-1/empty +TNF- $\alpha$<br>vs HMEC-1/empty -TNF- $\alpha$ |      |            | HMEC-1/IKK2 -TNF- $\alpha$<br>vs HMEC-1/empty -TNF- $\alpha$ |      |            |
|--------------|-------------------------------------------------------------------------------------|-------------|----------|---------------------------------------------------------------|------|------------|--------------------------------------------------------------|------|------------|
|              |                                                                                     |             |          | *SLR                                                          | sd   | Fold       | *SLR                                                         | sd   | Fold       |
| 201502_s_at  | nuclear factor of kappa light polypeptide gene enhancer in B-cells inhibitor, alpha | NFKBIA      | A1078167 | 2,05                                                          | 0,39 | <b>4,1</b> | 1,61                                                         | 0,32 | <b>3,1</b> |
| 210002_at    | GATA binding protein 6                                                              | GATA6       | D87811.1 | 2,17                                                          | 0,99 | <b>4,5</b> | 2,64                                                         | 0,9  | <b>6,2</b> |

(Comparison HMEC-/empty vector +TNF- $\alpha$  vs HMEC-1/ empty vector -TNF- $\alpha$  (Increase) and HMEC-1/IKK2 -TNF- $\alpha$  vs HMEC-1/empty vector - TNF- $\alpha$  (Increase) less HMEC-1/I $\kappa$ B $\alpha$  +TNF- $\alpha$  vs HMEC-1/empty +TNF- $\alpha$  (Decrease) ).

\* SLR: signal log ratio (mean of three independent hybridization experiments).

**Table 4.** Genes up-regulated in unstimulated HMEC-1/CA IKK2 and down-regulated in TNF- $\alpha$ -stimulated HMEC-1/TD I $\kappa$ B $\alpha$ .

| Probe Set ID | Gene Title                                                                               | Gene Symbol | Acc No.     | HMEC-1/I $\kappa$ B $\alpha$ +TNF- $\alpha$ vs<br>HMEC-1/empty +TNF- $\alpha$ |      |            | HMEC-1/IKK2 -TNF- $\alpha$ vs<br>HMEC-1/empty -TNF- $\alpha$ |      |             |
|--------------|------------------------------------------------------------------------------------------|-------------|-------------|-------------------------------------------------------------------------------|------|------------|--------------------------------------------------------------|------|-------------|
|              |                                                                                          |             |             | *SLR                                                                          | sd   | Fold       | *SLR                                                         | sd   | Fold        |
| 202145_at    | lymphocyte antigen 6 complex, locus E                                                    | LY6E        | NM_002346.1 | -2,14                                                                         | 0,46 | <b>4,4</b> | 2,48                                                         | 0,51 | <b>5,6</b>  |
| 203281_s_at  | ubiquitin-activating enzyme E1-like                                                      | UBE1L       | NM_003335.1 | -1,14                                                                         | 0,3  | <b>2,2</b> | 1,59                                                         | 0,16 | <b>3,0</b>  |
| 204415_at    | interferon, alpha-inducible protein (clone IFI-6-16)                                     | GIP3        | NM_022873.1 | -1,75                                                                         | 0,61 | <b>3,4</b> | 3,3                                                          | 0,94 | <b>9,8</b>  |
| 206082_at    | HLA complex P5                                                                           | HCP5        | NM_006674.1 | -2,37                                                                         | 1,09 | <b>5,2</b> | 1,83                                                         | 0,72 | <b>3,6</b>  |
| 206133_at    | XIAP associated factor-1                                                                 | HSXIAPAF1   | NM_017523.1 | -2,32                                                                         | 0,99 | <b>5,0</b> | 3,52                                                         | 0,69 | <b>11,5</b> |
| 206503_x_at  | promyelocytic leukemia                                                                   | PML         | NM_002675.1 | -1,3                                                                          | 0,18 | <b>2,5</b> | 2,29                                                         | 1,51 | <b>4,9</b>  |
| 208747_s_at  | complement component 1, s subcomponent                                                   | C1S         | M18767.1    | -1,87                                                                         | 0,44 | <b>3,7</b> | 4,62                                                         | 0,4  | <b>24,6</b> |
| 209040_s_at  | proteasome (prosome, macropain) subunit, beta type, 3 (large multifunctional protease 7) | PSMB8       | U17496.1    | -1,79                                                                         | 0,41 | <b>3,5</b> | 1,29                                                         | 0,17 | <b>2,4</b>  |
| 209124_at    | myeloid differentiation primary response gene (88)                                       | MYD88       | U70451.1    | -1,21                                                                         | 0,11 | <b>2,3</b> | 1,13                                                         | 0,09 | <b>2,2</b>  |
| 212067_s_at  | complement component 1, r subcomponent                                                   | C1R         | AL573058    | -2,13                                                                         | 1,19 | <b>4,4</b> | 2,7                                                          | 0,57 | <b>6,5</b>  |
| 213524_s_at  | putative lymphocyte G0/G1 switch gene                                                    | G0S2        | NM_015714.1 | -1,51                                                                         | 0,5  | <b>2,8</b> | 1,35                                                         | 0,29 | <b>2,5</b>  |
| 217436_x_at  | CDNA clone MGC:71446 IMAGE:5420082, complete cds                                         | M80469      |             | -1,53                                                                         | 0,11 | <b>2,9</b> | 1,35                                                         | 0,32 | <b>2,5</b>  |
| 217502_at    | interferon-induced protein with tetratricopeptide repeats 2                              | IFIT2       | BE888744    | -1,31                                                                         | 0,1  | <b>2,5</b> | 1,42                                                         | 0,17 | <b>2,7</b>  |
| 218182_s_at  | claudin 1                                                                                | CLDN1       | NM_021101.1 | -2,72                                                                         | 1,1  | <b>6,6</b> | 1,73                                                         | 0,98 | <b>3,3</b>  |
| 221432_s_at  | solute carrier family 25, member 28                                                      | SLC25A28    | NM_031212.1 | -1,26                                                                         | 0,12 | <b>2,4</b> | 1,54                                                         | 0,34 | <b>2,9</b>  |
| 221903_s_at  | cylindromatosis (turban tumor syndrome)                                                  | CYLD        | BE046443    | -1,1                                                                          | 0,11 | <b>2,1</b> | 1,36                                                         | 0,2  | <b>2,6</b>  |
| 53720_at     | hypothetical protein FLJ11286                                                            | FLJ11286    | AI862559    | -1,33                                                                         | 0,14 | <b>2,5</b> | 1,16                                                         | 0,2  | <b>2,2</b>  |

(Comparison HMEC-1/I $\kappa$ B $\alpha$  +TNF- $\alpha$  vs HMEC-1/empty +TNF- $\alpha$  (Decrease) and HMEC-1/IKK2 -TNF- $\alpha$  vs HMEC-1/empty vector -TNF- $\alpha$  (Increase) less HMEC-/empty vector +TNF- $\alpha$  vs HMEC-1/ empty vector -TNF- $\alpha$  (Increase) ).

\* SLR: signal log ratio (mean of three independent hybridization experiments).

<sup>1</sup> Gene with multiple hits on the genechip.

**Table 5.** Genes up-regulated in TNF- $\alpha$ -stimulated control HMEC-1/empty vector.

| Probe Set ID | Gene Title                                            | Gene Symbol | Acc No.    | HMEC-1/empty +TNF vs<br>HMEC-1/empty -TNF |      |            |
|--------------|-------------------------------------------------------|-------------|------------|-------------------------------------------|------|------------|
|              |                                                       |             |            | *SLR                                      | sd   | Fold       |
| 201626_at    | insulin induced gene 1                                | INSIG1      | BG292233   | 1,35                                      | 0,45 | <b>2,5</b> |
| 202843_at    | Dnaj (Hsp40) homolog, subfamily B, member 9           | DNAJB9      | NM_012328  | 1,22                                      | 0,23 | <b>2,3</b> |
| 208296_x_at  | tumor necrosis factor, alpha-induced protein 8        | TNFAIP8     | NM_014350  | 1,29                                      | 0,27 | <b>2,4</b> |
| 210310_s_at  | fibroblast growth factor 5                            | FGF5        | AB016517.1 | 1,46                                      | 0,47 | <b>2,8</b> |
| 214130_s_at  | phosphodiesterase 4D interacting protein (myomegalin) | PDE4DIP     | AI821791   | 1,08                                      | 0,24 | <b>2,1</b> |
| 221085_at    | tumor necrosis factor (ligand) superfamily, member 15 | TNFSF15     | NM_005118  | 1,62                                      | 0,54 | <b>3,1</b> |

(Comparison HMEC-/empty vector +TNF- $\alpha$  vs HMEC-1/ empty vector -TNF- $\alpha$  (Increase) less HMEC-1/IKK2 -TNF- $\alpha$  vs HMEC-1/empty vector - TNF- $\alpha$  (Increase) less HMEC-1/I $\kappa$ B $\alpha$  +TNF- $\alpha$  vs HMEC-1/empty +TNF- $\alpha$  (Decrease) ).

\* SLR: signal log ratio (mean of three independent hybridization experiments).

**Table 6.** Genes constitutively up-regulated in unstimulated HMEC-1/CA IKK2 compared to unstimulated control cells.

| Probe Set ID | Gene Title                                                                                                               | Gene Symbol | Acc No.     | HMEC-1/IKK2 -TNF- $\alpha$<br>vs HMEC-1/empty -TNF- $\alpha$ |      |             |
|--------------|--------------------------------------------------------------------------------------------------------------------------|-------------|-------------|--------------------------------------------------------------|------|-------------|
|              |                                                                                                                          |             |             | *SLR                                                         | sd   | Fold        |
| 200923_at    | lectin, galactoside-binding, soluble, 3 binding protein                                                                  | LGALS3BP    | NM_005567.2 | 1,49                                                         | 0,39 | <b>2,8</b>  |
| 201295_s_at  | WD repeat and SOCS box-containing 1                                                                                      | WSB1        | BF111821    | 1,16                                                         | 0,32 | <b>2,2</b>  |
| 203037_s_at  | metastasis suppressor 1                                                                                                  | MTSS1       | NM_014751.1 | 1,26                                                         | 0,29 | <b>2,4</b>  |
| 203729_at    | epithelial membrane protein 3                                                                                            | EMP3        | NM_001425.1 | 1,57                                                         | 0,23 | <b>3,0</b>  |
| 203789_s_at  | sema domain, immunoglobulin domain (Ig), short basic domain, secreted, (semaphorin) 3C                                   | SEMA3C      | NM_006379.1 | 1,57                                                         | 0,35 | <b>3,0</b>  |
| 204821_at    | butyrophilin, subfamily 3, member A3                                                                                     | BTN3A3      | NM_006994.2 | 1,37                                                         | 0,28 | <b>2,6</b>  |
| 204838_s_at  | endothelial cell growth factor 1 (platelet-derived)                                                                      | ECGF1       | NM_001953.2 | 1,57                                                         | 0,31 | <b>3,0</b>  |
| 205114_s_at  | chemokine (C-C motif) ligand 3                                                                                           | CCL3        | NM_002983.1 | 2,66                                                         | 1,37 | <b>6,3</b>  |
| 205205_at    | v-rel reticuloendotheliosis viral oncogene homolog B, nuclear factor of kappa light polypeptide gene enhancer in B-cells | RELB        | NM_006509.1 | 1,62                                                         | 0,37 | <b>3,1</b>  |
| 205239_at    | amphiregulin (schwannoma-derived growth factor)                                                                          | AREG        | NM_001657.1 | 1,24                                                         | 0,19 | <b>2,4</b>  |
| 205659_at    | histone deacetylase 9                                                                                                    | HDAC9       | NM_014707.1 | 1,75                                                         | 0,63 | <b>3,4</b>  |
| 206271_at    | toll-like receptor 3                                                                                                     | TLR3        | NM_003265.1 | 1,18                                                         | 0,18 | <b>2,3</b>  |
| 207485_x_at  | butyrophilin, subfamily 3, member A1                                                                                     | BTN3A1      | NM_007048.1 | 1,72                                                         | 0,61 | <b>3,3</b>  |
| 207535_s_at  | nuclear factor of kappa light polypeptide gene enhancer in B-cells 2 (p49/p100)                                          | NFKB2       | NM_002502.1 | 2,82                                                         | 1,98 | <b>7,1</b>  |
| 207536_s_at  | tumor necrosis factor receptor superfamily, member 9                                                                     | TNFRSF9     | NM_001561.2 | 1,66                                                         | 0,47 | <b>3,2</b>  |
| 207626_s_at  | solute carrier family 7 (cationic amino acid transporter, y+ system), member 2                                           | SLC7A2      | NM_003046.1 | 3,52                                                         | 1,35 | <b>11,5</b> |
| 209006_s_at  | NPD014 protein                                                                                                           | NPD014      | AF247168.1  | 1,51                                                         | 0,38 | <b>2,8</b>  |
| 209446_s_at  | hypothetical protein FLJ10803                                                                                            | FLJ10803    | BC001743.1  | 2,05                                                         | 1,13 | <b>4,1</b>  |
| 209619_at    | CD74 antigen (invariant polypeptide of major histocompatibility complex, class II antigen-associated)                    | CD74        | K01144.1    | 2,28                                                         | 0,98 | <b>4,9</b>  |
| 210425_x_at  | golgin-67                                                                                                                | GOLGIN-67   | AF164622.1  | 1,11                                                         | 0,19 | <b>2,2</b>  |
| 210705_s_at  | tripartite motif-containing 5                                                                                            | TRIM5       | AF220028.1  | 1,09                                                         | 0,15 | <b>2,1</b>  |
| 210794_s_at  | maternally expressed 3                                                                                                   | MEG3        | AF119863.1  | 1,33                                                         | 0,13 | <b>2,5</b>  |
| 211027_s_at  | inhibitor of kappa light polypeptide gene enhancer in B-cells, kinase beta                                               | IKKKB       | BC006231.1  | 4,84                                                         | 1,61 | <b>28,6</b> |
| 213139_at    | snail homolog 2 (Drosophila)                                                                                             | SNAI2       | AI572079    | 1,47                                                         | 0,3  | <b>2,8</b>  |
| 213418_at    | heat shock 70kDa protein 6 (HSP70E)                                                                                      | HSPA6       | NM_002155.1 | 2,24                                                         | 0,37 | <b>4,7</b>  |
| 213517_at    | poly(rC) binding protein 2                                                                                               | PCBP2       | AW103422    | 1,28                                                         | 0,37 | <b>2,4</b>  |
| 213865_at    | discoidin, CUB and LCCL domain containing 2                                                                              | DCBLD2      | AI378788    | 2,35                                                         | 0,94 | <b>5,1</b>  |
| 214753_at    | phosphonofomate immuno-associated protein 5                                                                              | PFAAP5      | AW084068    | 2,1                                                          | 0,58 | <b>4,3</b>  |
| 216913_s_at  | KIAA0690                                                                                                                 | KIAA0690    | AK021460.1  | 1,94                                                         | 0,95 | <b>3,8</b>  |
| 217388_s_at  | kynureninase (L-kynurenine hydrolase)                                                                                    | KYNU        | D55639.1    | 4,52                                                         | 1,25 | <b>22,9</b> |
| 219716_at    | apolipoprotein L, 6                                                                                                      | APOL6       | NM_030641.1 | 1,31                                                         | 0,14 | <b>2,5</b>  |
| 219759_at    | leukocyte-derived arginine aminopeptidase                                                                                | LRAP        | NM_022350.1 | 1,54                                                         | 0,56 | <b>2,9</b>  |
| 220230_s_at  | cytochrome b5 reductase b5R.2                                                                                            | CYB5R2      | NM_016229.1 | 1,58                                                         | 0,54 | <b>3,0</b>  |
| 220518_at    | target of Nesh-SH3                                                                                                       | TARSH       | NM_024801.1 | 2,07                                                         | 0,48 | <b>4,2</b>  |
| 221009_s_at  | angiopoietin-like 4                                                                                                      | ANGPTL4     | NM_016109.1 | 1,42                                                         | 0,24 | <b>2,7</b>  |
| 221766_s_at  | chromosome 6 open reading frame 37                                                                                       | C6orf37     | AW246673    | 1,31                                                         | 0,27 | <b>2,5</b>  |
| 221854_at    | plakophilin 1 (ectodermal dysplasia/skin fragility syndrome)                                                             | PKP1        | AI378979    | 2,36                                                         | 0,47 | <b>5,1</b>  |

(Comparison HMEC-1/IKK2 -TNF- $\alpha$  vs HMEC-1/empty vector -TNF- $\alpha$  (Increase) less HMEC-1/empty vector +TNF- $\alpha$  vs HMEC-1/empty vector -TNF- $\alpha$  (Increase) less HMEC-1/IkBa +TNF- $\alpha$  vs HMEC-1/empty +TNF- $\alpha$  (Decrease) ).

\* SLR: signal log ratio (mean of three independent hybridization experiments).

<sup>1</sup> Gene with more than one hit on the genechip

**Table 7.** Genes down-regulated in TNF- $\alpha$  stimulated HMEC-1/TD IkB $\alpha$  cells compared to stimulated control HMEC-1/empty vector cells.

| Probe Set ID | Gene Title                                                                         | Gene Symbol   | Acc No.     | HMEC-1/IkB $\alpha$ +TNF- $\alpha$ vs<br>HMEC-1/empty +TNF- $\alpha$ |      |             |
|--------------|------------------------------------------------------------------------------------|---------------|-------------|----------------------------------------------------------------------|------|-------------|
|              |                                                                                    |               |             | *SLR                                                                 | sd   | Fold        |
| 200814_at    | proteasome (prosome, macropain) activator subunit 1 (PA28 alpha)                   | PSME1         | NM_006263.1 | -1,09                                                                | 0,17 | <b>2,1</b>  |
| 201170_s_at  | basic helix-loop-helix domain containing, class B, 2                               | BHLHB2        | NM_003670.1 | -1,31                                                                | 0,21 | <b>2,5</b>  |
| 201329_s_at  | v-ets erythroblastosis virus E26 oncogene homolog 2 (avian)                        | ETS2          | NM_005239.1 | -1,26                                                                | 0,18 | <b>2,4</b>  |
| 201473_at    | jun B proto-oncogene                                                               | JUNB          | NM_002229.1 | -1,64                                                                | 0,61 | <b>3,1</b>  |
| 201489_at    | peptidylprolyl isomerase F (cyclophilin F)                                         | PIPF          | BC005020.1  | -1,07                                                                | 0,12 | <b>2,1</b>  |
| 201939_at    | polo-like kinase 2 (Drosophila)                                                    | PLK2          | NM_006622.1 | -1,49                                                                | 0,19 | <b>2,8</b>  |
| 202074_s_at  | optineurin                                                                         | OPTN          | NM_021980.1 | -1,39                                                                | 0,24 | <b>2,6</b>  |
| 202076_at    | baculoviral IAP repeat-containing 2                                                | BIRC2         | NM_001166.2 | -1,13                                                                | 0,15 | <b>2,2</b>  |
| 202149_at    | neural precursor cell expressed, developmentally down-regulated 9                  | NEDD9         | AL136139    | -1,47                                                                | 0,33 | <b>2,8</b>  |
| 202181_at    | KIAA0247                                                                           | KIAA0247      | NM_014734.1 | -1,17                                                                | 0,14 | <b>2,3</b>  |
| 202330_s_at  | uracil-DNA glycosylase                                                             | UNG           | NM_003362.1 | -1,07                                                                | 0,17 | <b>2,1</b>  |
| 202555_s_at  | myosin, light polypeptide kinase                                                   | MYLK          | NM_005965.1 | -1,37                                                                | 0,19 | <b>2,6</b>  |
| 202672_s_at  | activating transcription factor 3                                                  | ATF3          | NM_001674.1 | -1,49                                                                | 0,1  | <b>2,8</b>  |
| 202847_at    | phosphoenolpyruvate carboxykinase 2 (mitochondrial)                                | PCK2          | NM_004563.1 | -1,26                                                                | 0,26 | <b>2,4</b>  |
| 203438_at    | stanniocalcin 2                                                                    | STC2          | A1435828    | -1,29                                                                | 0,33 | <b>2,4</b>  |
| 203632_s_at  | G protein-coupled receptor, family C, group 5, member B                            | GPRC5B        | NM_016235.1 | -1,68                                                                | 0,1  | <b>3,2</b>  |
| 203879_at    | phosphoinositide-3-kinase, catalytic, delta polypeptide                            | PIK3CD        | U86453.1    | -1,11                                                                | 0,14 | <b>2,2</b>  |
| 203964_at    | N-myc (and STAT) interactor                                                        | NMI           | NM_004688.1 | -1,2                                                                 | 0,23 | <b>2,3</b>  |
| 204702_s_at  | nuclear factor (erythroid-derived 2)-like 3                                        | NFE2L3        | NM_004289.3 | -1,39                                                                | 0,18 | <b>2,6</b>  |
| 204715_at    | pannexin 1                                                                         | PANX1         | NM_015368.1 | -1,24                                                                | 0,14 | <b>2,4</b>  |
| 204823_at    | neuron navigator 3                                                                 | NAV3          | NM_014903.1 | -1,53                                                                | 0,19 | <b>2,9</b>  |
| 204933_s_at  | tumor necrosis factor receptor superfamily, member 11b (osteoprotegerin)           | TNFRSF11B     | NM_002546.1 | -2,63                                                                | 0,59 | <b>6,2</b>  |
| 205047_s_at  | asparagine synthetase                                                              | ASNS          | NM_001673.1 | -1,53                                                                | 0,41 | <b>2,9</b>  |
| 205146_x_at  | amyloid beta (A4) precursor protein-binding, family A, member 3 (X11-like 2)       | APBA3         | NM_004886.1 | -2,26                                                                | 0,87 | <b>4,8</b>  |
| 205288_at    | CDC14 cell division cycle 14 homolog A (S. cerevisiae)                             | CDC14A        | NM_003672.1 | -1,16                                                                | 0,28 | <b>2,2</b>  |
| 205398_s_at  | SMAD, mothers against DPP homolog 3 (Drosophila)                                   | SMAD3         | NM_005902.1 | -1,15                                                                | 0,13 | <b>2,2</b>  |
| 205569_at    | lysosomal-associated membrane protein 3                                            | LAMP3         | NM_014398.1 | -2,46                                                                | 0,18 | <b>5,5</b>  |
| 206290_s_at  | regulator of G-protein signalling 7                                                | RGS7          | NM_002924.1 | -1,35                                                                | 0,43 | <b>2,5</b>  |
| 207843_x_at  | cytochrome b-5                                                                     | CYB5          | NM_001914.1 | -1,28                                                                | 0,16 | <b>2,4</b>  |
| 208829_at    | TAP binding protein (tapasin)                                                      | TAPBP         | AF029750.1  | -1,86                                                                | 0,21 | <b>3,6</b>  |
| 209074_s_at  | TU3A protein                                                                       | TU3A          | AL050264.1  | -2,01                                                                | 1,03 | <b>4,0</b>  |
| 209239_at    | nuclear factor of kappa light polypeptide gene enhancer in B-cells 1 (p105)        | NFKB1         | M55643.1    | -1,24                                                                | 0,12 | <b>2,4</b>  |
| 209897_s_at  | slit homolog 2 (Drosophila)                                                        | SLIT2         | AF055585.1  | -1,46                                                                | 0,18 | <b>2,8</b>  |
| 211126_s_at  | cysteine and glycine-rich protein 2                                                | CSRFP2        | U46006.1    | -1,22                                                                | 0,2  | <b>2,3</b>  |
| 211529_x_at  | HLA-G histocompatibility antigen, class I, G                                       | HLA-G         | M90684.1    | -1,55                                                                | 0,2  | <b>2,9</b>  |
| 211981_at    | collagen, type IV, alpha 1                                                         | COL4A1        | NM_001845.1 | -1,63                                                                | 0,19 | <b>3,1</b>  |
| 213294_at    | hypothetical protein FLJ38348                                                      | FLJ38348      | AV755522    | -1,16                                                                | 0,12 | <b>2,2</b>  |
| 214448_x_at  | nuclear factor of kappa light polypeptide gene enhancer in B-cells inhibitor, beta | NFKBIB        | NM_002503.1 | -1,63                                                                | 0,74 | <b>3,1</b>  |
| 214632_at    | neuropilin 2                                                                       | NRP2          | AA295257    | -1,21                                                                | 0,22 | <b>2,3</b>  |
| 215933_s_at  | hematopoietically expressed homeobox                                               | HHEX          | Z21533.1    | -1,24                                                                | 0,1  | <b>2,4</b>  |
| 216020_at    | MRNA; cDNA DKFZp586D0522 (from clone DKFZp586D0522)                                |               | AL080107.1  | -3,41                                                                | 1,02 | <b>10,6</b> |
| 218284_at    | DKFZP586N0721 protein                                                              | DKFZP586N0721 | NM_015400.1 | -1,11                                                                | 0,12 | <b>2,2</b>  |
| 218543_s_at  | zinc finger CCCH type domain containing 1                                          | ZC3HDC1       | NM_022750.1 | -1,35                                                                | 0,14 | <b>2,5</b>  |
| 218810_at    | hypothetical protein FLJ23231                                                      | FLJ23231      | NM_025079.1 | -2,26                                                                | 1,38 | <b>4,8</b>  |
| 218995_s_at  | endothelin 1                                                                       | EDN1          | NM_001955.1 | -1,49                                                                | 0,21 | <b>2,8</b>  |
| 219270_at    | hypothetical protein MGC4504                                                       | MGC4504       | NM_024111.1 | -1,38                                                                | 0,31 | <b>2,6</b>  |
| 221059_s_at  | carbohydrate (N-acetylglucosamine 6-O) sulfotransferase 6                          | CHST6         | NM_021615.1 | -1,12                                                                | 0,1  | <b>2,2</b>  |
| 222062_at    | interleukin 27 receptor, alpha                                                     | IL27RA        | A1983115    | -2,1                                                                 | 0,36 | <b>4,3</b>  |
| 36564_at     | IBR domain containing 3                                                            | IBRDC3        | W27419      | -1,38                                                                | 0,34 | <b>2,6</b>  |

(Comparison HMEC-1/IkB $\alpha$  +TNF- $\alpha$  vs HMEC-1/empty +TNF- $\alpha$  (Decrease) less HMEC-1/IKK2 -TNF- $\alpha$  vs

HMEC-1/empty vector -TNF- $\alpha$  (Increase) less HMEC-1/empty vector +TNF- $\alpha$  vs HMEC-1/empty vector -TNF- $\alpha$  (Increase) ).

\* SLR: signal log ratio (mean of three independent hybridization experiments).

<sup>1</sup> Gene with more than one hit in the genechip.

**Table 8.** IKK/NF- $\kappa$ B-dependent down-regulated target genes.

| Probe ID    | Gene                                                              | Symbol        | Acc. No.                 | HMEC-1/empty +TNF- $\alpha$ vs<br>HMEC-1/empty -TNF- $\alpha$ |      |          | HMEC-1/IKK2 -TNF- $\alpha$ vs<br>HMEC-1/empty -TNF- $\alpha$ |      |          | HMEC-1/ $\kappa$ B $\alpha$ +TNF- $\alpha$ vs<br>HMEC-1/empty +TNF- $\alpha$ |      |          |
|-------------|-------------------------------------------------------------------|---------------|--------------------------|---------------------------------------------------------------|------|----------|--------------------------------------------------------------|------|----------|------------------------------------------------------------------------------|------|----------|
|             |                                                                   |               |                          | *SLR                                                          | sd   | Fold     | *SLR                                                         | sd   | Fold     | *SLR                                                                         | sd   | Fold     |
| 203407_at   | periplakin                                                        | PPL           | NM_002705.1              | -2,87                                                         | 0,83 | <b>7</b> | -1,54                                                        | 0,26 | <b>3</b> | 2,58                                                                         | 0,82 | <b>6</b> |
| 203799_at   | type 1 transmembrane C-type lectin receptor DCL-1                 | DCL-1         | NM_014880.1              | -1,42                                                         | 0,19 | <b>3</b> | -1,44                                                        | 0,11 | <b>3</b> | 1,09                                                                         | 0,2  | <b>2</b> |
| 203917_at   | coxsackie virus and adenovirus receptor                           | CXADR         | NM_001338.1              | -1,17                                                         | 0,28 | <b>2</b> | -1,74                                                        | 0,28 | <b>3</b> | 2,1                                                                          | 0,21 | <b>4</b> |
| 204072_s_at | hypothetical protein CG003                                        | 13CDNA73      | <sup>1</sup> NM_023037.1 | -1,4                                                          | 0,22 | <b>3</b> | -1,29                                                        | 0,18 | <b>2</b> | 1,19                                                                         | 0,23 | <b>2</b> |
| 207761_s_at | DKFZP586A0522 protein                                             | DKFZP586A0522 | D13889.1                 | -2,19                                                         | 0,14 | <b>5</b> | -1,56                                                        | 0,11 | <b>3</b> | 1,34                                                                         | 0,19 | <b>3</b> |
| 209687_at   | chemokine (C-X-C motif) ligand 12 (stromal cell-derived factor 1) | CXCL12        | U19495.1                 | -2,13                                                         | 0,98 | <b>4</b> | -1,31                                                        | 0,14 | <b>2</b> | 2,26                                                                         | 1,09 | <b>5</b> |
| 212096_s_at | mitochondrial tumor suppressor gene 1                             | MTSG1         | AL096842.1               | -1,07                                                         | 0,07 | <b>2</b> | -1,34                                                        | 0,1  | <b>3</b> | 1,25                                                                         | 0,05 | <b>2</b> |
| 212830_at   | EGF-like-domain, multiple 5                                       | EGFL5         | W68084                   | -1,17                                                         | 0,17 | <b>2</b> | -1,2                                                         | 0,13 | <b>2</b> | 1,19                                                                         | 0,09 | <b>2</b> |
| 213436_at   | cannabinoid receptor 1 (brain)                                    | CNR1          | U73304                   | -1,31                                                         | 0,33 | <b>2</b> | -1,65                                                        | 0,36 | <b>3</b> | 1,24                                                                         | 0,21 | <b>2</b> |
| 219230_at   | hypothetical protein FLJ10970                                     | FLJ10970      | NM_018286.1              | -1,72                                                         | 0,25 | <b>3</b> | -1,4                                                         | 0,23 | <b>3</b> | 2,07                                                                         | 0,25 | <b>4</b> |

(Comparison HMEC-/empty vector +TNF- $\alpha$  vs HMEC-1/ empty vector -TNF- $\alpha$  (Decrease) and HMEC-1/ $\kappa$ B $\alpha$  -TNF- $\alpha$  vs HMEC-1/empty +TNF- $\alpha$  (Increase) and HMEC-1/IKK2 -TNF- $\alpha$  vs HMEC-1/empty vector - TNF- $\alpha$  (Decrease) ).

\* SLR: signal log ratio (mean of three independent hybridization experiments).

<sup>1</sup> Gene with more than one hit on the genechip.

**Table 9.** Genes down-regulated in TNF- $\alpha$ -stimulated control HMEC-1/empty vector and up-regulated in stimulated HMEC-1/TD I $\kappa$ B $\alpha$ .

| Probe Set ID | Gene Title                                                                              | Gene Symbol | Acc. No.    | HMEC-1/empty +TNF- $\alpha$<br>vs HMEC-1/empty -TNF- $\alpha$ |      |            | HMEC-1/I $\kappa$ B $\alpha$ +TNF- $\alpha$<br>vs HMEC-1/empty +TNF- $\alpha$ |      |            |
|--------------|-----------------------------------------------------------------------------------------|-------------|-------------|---------------------------------------------------------------|------|------------|-------------------------------------------------------------------------------|------|------------|
|              |                                                                                         |             |             | *SLR                                                          | sd   | Fold       | *SLR                                                                          | sd   | Fold       |
| 202016_at    | mesoderm specific transcript homolog (mouse)                                            | MEST        | NM_002402.1 | -1,35                                                         | 0,13 | <b>2,5</b> | 1,27                                                                          | 0,1  | <b>2,4</b> |
| 202342_s_at  | tripartite motif-containing 2                                                           | TRIM2       | NM_015271.1 | -1,37                                                         | 0,5  | <b>2,6</b> | 1,28                                                                          | 0,31 | <b>2,4</b> |
| 203716_s_at  | dipeptidylpeptidase 4 (CD26, adenosine deaminase complexing protein 2)                  | DPP4        | M80536.1    | -2,14                                                         | 0,95 | <b>4,4</b> | 1,67                                                                          | 0,96 | <b>3,2</b> |
| 203803_at    | prenylcysteine oxidase 1                                                                | PCYOX1      | N45309      | -1,46                                                         | 0,31 | <b>2,8</b> | 1,29                                                                          | 0,11 | <b>2,4</b> |
| 203887_s_at  | thrombomodulin                                                                          | THBD        | NM_000361.1 | -1,32                                                         | 0,22 | <b>2,5</b> | 1,64                                                                          | 0,18 | <b>3,1</b> |
| 204014_at    | dual specificity phosphatase 4                                                          | DUSP4       | NM_001394.2 | -2,14                                                         | 0,48 | <b>4,4</b> | 1,96                                                                          | 0,26 | <b>3,9</b> |
| 205529_s_at  | core-binding factor, runt domain, alpha subunit 2, translocated to, 1; cyclin D-related | CBFA2T1     | NM_004349.1 | -1,38                                                         | 0,13 | <b>2,6</b> | 1,62                                                                          | 0,3  | <b>3,1</b> |
| 212992_at    | chromosome 14 open reading frame 78                                                     | C14orf78    | A1935123    | -1,72                                                         | 0,18 | <b>3,3</b> | 1,8                                                                           | 0,11 | <b>3,5</b> |

(Comparison HMEC-1/empty vector +TNF- $\alpha$  vs HMEC-1/empty vector -TNF- $\alpha$  (Decrease) and HMEC-1/I $\kappa$ B $\alpha$  +TNF- $\alpha$  vs HMEC-1/empty vector +TNF- $\alpha$  (Increase) less HMEC-1/I $\kappa$ B $\alpha$  -TNF- $\alpha$  vs HMEC-1/empty vector -TNF- $\alpha$  (Decrease)).

\* SLR: signal log ratio (mean of three independent hybridization experiments).

<sup>1</sup> Gene with more than one hit on the genechip.

**Table 10.** Genes down-regulated in TNF- $\alpha$ -stimulated control HMEC-1/empty vector and in unstimulated HMEC-1/CA IKK2.

| Probe Set ID | Gene Title                                                                             | Gene Symbol | Acc. No.    | HMEC-1/empty +TNF- $\alpha$<br>vs HMEC-1/empty -TNF- $\alpha$ |      |            | HMEC-1/IKK2 -TNF- $\alpha$<br>vs HMEC-1/empty -TNF- $\alpha$ |      |            |
|--------------|----------------------------------------------------------------------------------------|-------------|-------------|---------------------------------------------------------------|------|------------|--------------------------------------------------------------|------|------------|
|              |                                                                                        |             |             | *SLR                                                          | sd   | Fold       | *SLR                                                         | sd   | Fold       |
| 201904_s_at  | CTD (carboxy-terminal domain, RNA polymerase II, polypeptide A) small phosphatase-like | CTDSPL      | BF031714    | -1,22                                                         | 0,17 | <b>2,3</b> | -1,27                                                        | 0,14 | <b>2,4</b> |
| 204818_at    | hydroxysteroid (17-beta) dehydrogenase 2                                               | HSD17B2     | NM_002153.1 | -2,25                                                         | 1,35 | <b>4,8</b> | -1,49                                                        | 0,3  | <b>2,8</b> |
| 205612_at    | multimerin 1                                                                           | MMRN1       | NM_007351.1 | -1,52                                                         | 0,28 | <b>2,9</b> | -2,73                                                        | 0,34 | <b>6,6</b> |
| 212224_at    | aldehyde dehydrogenase 1 family, member A1                                             | ALDH1A1     | NM_000689.1 | -1,84                                                         | 0,3  | <b>3,6</b> | -1,84                                                        | 0,33 | <b>3,6</b> |
| 219436_s_at  | endomucin                                                                              | EMCN        | NM_016242.1 | -1,72                                                         | 0,36 | <b>3,3</b> | -1,54                                                        | 0,29 | <b>2,9</b> |
| 221911_at    | hypothetical protein LOC221810                                                         | LOC221810   | BE881590    | -1,4                                                          | 0,47 | <b>2,6</b> | -2,78                                                        | 1,22 | <b>6,9</b> |

(Comparison HMEC-1/empty vector +TNF- $\alpha$  vs HMEC-1/empty vector -TNF- $\alpha$  (Decrease) and HMEC-1/IKK2 -TNF- $\alpha$  vs HMEC-1/empty vector -TNF- $\alpha$  (Decrease) less HMEC-1/I $\kappa$ B $\alpha$  +TNF- $\alpha$  vs HMEC-1/empty +TNF- $\alpha$  (Increase)).

\* SLR: signal log ratio (mean of three independent hybridization experiments).

**Table 11.** Genes down-regulated in unstimulated HMEC-1/CA IKK2 and up-regulated in TNF- $\alpha$ -stimulated HMEC-1/TD I $\kappa$ B $\alpha$ .

| Probe Set ID | Gene Title                         | Gene Symbol | Acc. No.    | HMEC-1/IKK2 -TNF- $\alpha$<br>vs HMEC-1/empty -TNF- $\alpha$ |      |            | HMEC-1/I $\kappa$ B $\alpha$ +TNF- $\alpha$<br>vs HMEC-1/empty +TNF- $\alpha$ |      |            |
|--------------|------------------------------------|-------------|-------------|--------------------------------------------------------------|------|------------|-------------------------------------------------------------------------------|------|------------|
|              |                                    |             |             | SLR                                                          | sd   | Fold       | *SLR                                                                          | sd   | Fold       |
| 204931_at    | transcription factor 21            | TCF21       | NM_003206.1 | -2,86                                                        | 0,56 | <b>7,3</b> | 1,57                                                                          | 0,2  | <b>3,0</b> |
| 217028_at    | chemokine (C-X-C motif) receptor 4 | CXCR4       | AJ224869    | -2,3                                                         | 0,26 | <b>4,9</b> | 1,31                                                                          | 0,07 | <b>2,5</b> |
| 218723_s_at  | response gene to complement 32     | RGC32       | NM_014059.1 | -1,52                                                        | 0,31 | <b>2,9</b> | 1,52                                                                          | 0,31 | <b>2,9</b> |
| 202202_s_at  | latunin, alpha 4                   | LAMA4       | NM_002290.2 | -1,37                                                        | 0,22 | <b>2,6</b> | 1,6                                                                           | 0,58 | <b>3,0</b> |

(Comparison HMEC-1/I $\kappa$ B $\alpha$  +TNF- $\alpha$  vs HMEC-1/empty +TNF- $\alpha$  (Increase) and HMEC-1/IKK2 -TNF- $\alpha$  vs

HMEC-1/empty vector -TNF- $\alpha$  (Decrease) less HMEC-1/empty vector +TNF- $\alpha$  vs HMEC-1/empty vector -TNF- $\alpha$  (Decrease)).

\* SLR: signal log ratio (mean of three independent hybridization experiments).

**Table 12.** Genes down-regulated in TNF- $\alpha$ -stimulated control HMEC-1.

| Probe Set ID | Gene Title                                                             | Gene Symbol | Acc. No.    | HMEC-1/empty +TNF- $\alpha$<br>vs HMEC-1/empty -TNF- $\alpha$ . |      |            |
|--------------|------------------------------------------------------------------------|-------------|-------------|-----------------------------------------------------------------|------|------------|
|              |                                                                        |             |             | * SLR                                                           | sd   | Fold       |
| 200965_s_at  | actin binding LIM protein 1                                            | ABLIM1      | NM_006720.1 | -1,16                                                           | 0,28 | <b>2,2</b> |
| 201508_at    | insulin-like growth factor binding protein 4                           | IGFBP4      | NM_001552.1 | -1,33                                                           | 0,48 | <b>2,5</b> |
| 203780_at    | epithelial V-like antigen 1                                            | EVA1        | AF275945.1  | -1,11                                                           | 0,3  | <b>2,2</b> |
| 204048_s_at  | phosphatase and actin regulator 2                                      | PHACTR2     | AA551142    | -1,25                                                           | 0,19 | <b>2,4</b> |
| 204159_at    | cyclin-dependent kinase inhibitor 2C (p18, inhibits CDK4)              | CDKN2C      | NM_001262.1 | -1,14                                                           | 0,2  | <b>2,2</b> |
| 205399_at    | doublecortin and CaM kinase-like 1                                     | DCAMKL1     | NM_004734.1 | -2,04                                                           | 0,36 | <b>4,1</b> |
| 207164_s_at  | zinc finger protein 238                                                | ZNF238      | NM_006352.1 | -2,2                                                            | 1,36 | <b>4,6</b> |
| 208937_s_at  | inhibitor of DNA binding 1, dominant negative helix-loop-helix protein | ID1         | D13889.1    | -1,47                                                           | 0,48 | <b>2,8</b> |
| 212336_at    | erythrocyte membrane protein band 4.1-like 1                           | EPB41L1     | AA912711    | -1,32                                                           | 0,36 | <b>2,5</b> |
| 214021_x_at  | integrin, beta 5                                                       | ITGB5       | AI335208    | -1,3                                                            | 0,33 | <b>2,5</b> |
| 216361_s_at  | MYST histone acetyltransferase (monocytic leukemia) 3                  | MYST3       | AJ251844.1  | -1,7                                                            | 0,6  | <b>3,2</b> |
| 217974_at    | transmembrane 7 superfamily member 3                                   | TM7SF3      | NM_016551.1 | -1,34                                                           | 0,42 | <b>2,5</b> |
| 219563_at    | chromosome 14 open reading frame 139                                   | C14orf139   | NM_024633.1 | -1,22                                                           | 0,22 | <b>2,3</b> |

( Comparison HMEC-/empty vector +TNF- $\alpha$  vs HMEC-1/ empty vector -TNF- $\alpha$  (Decrease) less HMEC-1/IKK2 -TNF- $\alpha$  vs HMEC-1/empty vector - TNF- $\alpha$  (Decrease) less HMEC-1/I $\kappa$ B $\alpha$  +TNF- $\alpha$  vs HMEC-1/empty +TNF- $\alpha$  (Increase)).

\* SLR: signal log ratio (mean of three independent hybridization experiments).



**Table 13.** Genes constitutively down-regulated in unstimulated HMEC-1/CA IKK2 compared to unstimulated control HMEC-1/empty vector.

| Probe Set ID | Gene Title                                                                         | Gene Symbol   | Acc. No.    | HMEC-1/IKK2 -TNF- $\alpha$<br>vs HMEC-1/empty -TNF- $\alpha$ |      |             |
|--------------|------------------------------------------------------------------------------------|---------------|-------------|--------------------------------------------------------------|------|-------------|
|              |                                                                                    |               |             | *SLR                                                         | sd   | Fold        |
| 201261_x_at  | biglycan                                                                           | BGN           | BC002416.1  | -1,17                                                        | 0,09 | <b>2,3</b>  |
| 201694_s_at  | early growth response 1                                                            | EGR1          | NM_001964.1 | -1,88                                                        | 0,29 | <b>3,7</b>  |
| 201810_s_at  | SH3-domain binding protein 5 (BTK-associated)                                      | SH3BP5        | AL562152    | -1,16                                                        | 0,12 | <b>2,2</b>  |
| 201843_s_at  | EGF-containing fibulin-like extracellular matrix protein 1                         | EFEMP1        | NM_004105.2 | -1,38                                                        | 0,19 | <b>2,6</b>  |
| 202036_s_at  | secreted frizzled-related protein 1                                                | SFRP1         | AF017987.1  | -1,33                                                        | 0,28 | <b>2,5</b>  |
| 202207_at    | ADP-ribosylation factor-like 7                                                     | ARL7          | BG435404    | -1,24                                                        | 0,14 | <b>2,4</b>  |
| 202291_s_at  | matrix Gla protein                                                                 | MGP           | NM_000900.1 | -1,56                                                        | 0,19 | <b>2,9</b>  |
| 203099_s_at  | chromodomain protein, Y-like                                                       | CDYL          | AF081258.1  | -1,78                                                        | 0,56 | <b>3,4</b>  |
| 203395_s_at  | hairy and enhancer of split 1, (Drosophila)                                        | HES1          | NM_005524.2 | -2,75                                                        | 0,25 | <b>6,7</b>  |
| 203435_s_at  | membrane metallo-endopeptidase (neutral endopeptidase, enkephalinase, CALLA, CD10) | MME           | NM_007287.1 | -1,37                                                        | 0,3  | <b>2,6</b>  |
| 203680_at    | protein kinase, cAMP-dependent, regulatory, type II, beta                          | PRKAR2B       | NM_002736.1 | -1,44                                                        | 0,17 | <b>2,7</b>  |
| 204466_s_at  | synuclein, alpha (non A4 component of amyloid precursor)                           | SNCA          | BG260394    | -1,18                                                        | 0,11 | <b>2,3</b>  |
| 204955_at    | sushi-repeat-containing protein, X-linked                                          | SRPX          | NM_006307.1 | -2,4                                                         | 0,13 | <b>5,3</b>  |
| 205259_at    | nuclear receptor subfamily 3, group C, member 2                                    | NR3C2         | NM_000901.1 | -1,27                                                        | 0,22 | <b>2,4</b>  |
| 205547_s_at  | transgelin                                                                         | TAGLN         | NM_003186.2 | -2,05                                                        | 0,37 | <b>4,1</b>  |
| 205572_at    | angiopoietin 2                                                                     | ANGPT2        | NM_001147.1 | -2,59                                                        | 1,58 | <b>6,0</b>  |
| 205594_at    | KIAA0924 protein                                                                   | KIAA0924      | NM_014897.1 | -1,22                                                        | 0,27 | <b>2,3</b>  |
| 207808_s_at  | protein S (alpha)                                                                  | PROS1         | NM_000313.1 | -1,24                                                        | 0,14 | <b>2,4</b>  |
| 208891_at    | dual specificity phosphatase 6                                                     | DUSP6         | BC003143.1  | -1,33                                                        | 0,19 | <b>2,5</b>  |
| 209082_s_at  | collagen, type XVIII, alpha 1                                                      | COL18A1       | AF018081.1  | -1,27                                                        | 0,17 | <b>2,4</b>  |
| 209189_at    | v-fos FBJ murine osteosarcoma viral oncogene homolog                               | FOS           | BC004490.1  | -4,15                                                        | 0,61 | <b>17,8</b> |
| 209505_at    | nuclear receptor subfamily 2, group F, member 1                                    | NR2F1         | A1951185    | -1,3                                                         | 0,14 | <b>2,5</b>  |
| 209894_at    | leptin receptor                                                                    | LEPR          | U50748.1    | -1,58                                                        | 0,17 | <b>3,0</b>  |
| 212558_at    | sprouty homolog 1, antagonist of FGF signaling (Drosophila)                        | SPRY1         | BF508662    | -1,48                                                        | 0,26 | <b>2,8</b>  |
| 212605_s_at  | Clone 23872 mRNA sequence                                                          |               |             |                                                              |      |             |
| 212609_s_at  | serologically defined colon cancer antigen 8                                       | SDCCAG8       | AK025759.1  | -1,47                                                        | 0,3  | <b>2,8</b>  |
| 213156_at    | MRNA; cDNA DKFZp586B211 (from clone DKFZp586B211)                                  |               | U79271.1    | -1,32                                                        | 0,26 | <b>2,5</b>  |
| 213905_x_at  | biglycan                                                                           | BGN           | BG251521    | -1,41                                                        | 0,21 | <b>2,7</b>  |
| 214156_at    | myosin VIIA and Rab interacting protein                                            | MYRIP         | AA845258    | -1,24                                                        | 0,25 | <b>2,4</b>  |
| 215506_s_at  | ras homolog gene family, member 1                                                  | ARHI          | AL050090.1  | -1,64                                                        | 0,35 | <b>3,1</b>  |
| 218149_s_at  | zinc finger protein 395                                                            | ZNF395        | AK021882.1  | -2,07                                                        | 0,79 | <b>4,2</b>  |
| 219773_at    | NADPH oxidase 4                                                                    | NOX4          | NM_017606.1 | -1,36                                                        | 0,34 | <b>2,6</b>  |
| 219777_at    | human immune associated nucleotide 2                                               | HNAN2         | NM_016931.1 | -1,64                                                        | 0,3  | <b>3,1</b>  |
| 221031_s_at  | hypothetical protein DKFZp434F0318                                                 | DKFZP434F0318 | NM_024711.1 | -1,31                                                        | 0,18 | <b>2,5</b>  |
|              |                                                                                    |               | NM_030817.1 | -1,23                                                        | 0,21 | <b>2,3</b>  |

(Comparison HMEC-1/IKK2 -TNF- $\alpha$  vs HMEC-1/empty vector -TNF- $\alpha$  (Decrease) less HMEC-1/empty vector +TNF- $\alpha$  vs HMEC-1/empty vector -TNF- $\alpha$  (Decrease) less HMEC-1/I $\kappa$ B $\alpha$  +TNF- $\alpha$  vs HMEC-1/empty +TNF- $\alpha$  (Increase)).

\* SLR: signal log ratio (mean of three independent hybridization experiments).

<sup>1</sup> Gene with more than one hit on the genechip.

**Table 14.** Genes up-regulated in TNF- $\alpha$  activated HMEC-1/TD  $\text{I}\kappa\text{B}\alpha$  cells compared to activated control cells.

| Probe Set ID | Gene Title                                                                              | Gene Symbol | Acc. No.    | HMEC-1/ $\text{I}\kappa\text{B}\alpha$ +TNF- $\alpha$<br>vs HMEC-1/empty +TNF- $\alpha$ |      |             |
|--------------|-----------------------------------------------------------------------------------------|-------------|-------------|-----------------------------------------------------------------------------------------|------|-------------|
|              |                                                                                         |             |             | * SLR                                                                                   | sd   | Fold        |
| 201015_s_at  | junction plakoglobin                                                                    | JUP         | NM_021991.1 | 1,64                                                                                    | 0,69 | <b>3,1</b>  |
| 201167_x_at  | Rho GDP dissociation inhibitor (GDI) alpha                                              | ARHGDI1     | D13989.1    | 2,19                                                                                    | 0,56 | <b>4,6</b>  |
| 201367_s_at  | zinc finger protein 36, C3H type-like 2                                                 | ZFP36L2     | A1356398    | 2,37                                                                                    | 1,26 | <b>5,2</b>  |
| 201401_s_at  | adrenergic, beta, receptor kinase 1                                                     | ADRBK1      | M80776.1    | 3,06                                                                                    | 0,42 | <b>8,3</b>  |
| 201668_x_at  | myristoylated alanine-rich protein kinase C substrate                                   | MARCKS      | AW163148    | 1,93                                                                                    | 1,11 | <b>3,8</b>  |
| 201808_s_at  | endoglin (Osler-Rendu-Weber syndrome 1)                                                 | ENG         | BE732652    | 2,28                                                                                    | 0,95 | <b>4,9</b>  |
| 202046_s_at  | glucocorticoid receptor DNA binding factor 1                                            | GRLF1       | NM_004491.1 | 1,5                                                                                     | 0,54 | <b>2,8</b>  |
| 202082_s_at  | SEC14-like 1 ( <i>S. cerevisiae</i> )                                                   | SEC14L1     | AV748469    | 1,15                                                                                    | 0,17 | <b>2,2</b>  |
| 202118_s_at  | copine III                                                                              | CPNE3       | AA541758    | 1,41                                                                                    | 0,26 | <b>2,7</b>  |
| 202156_s_at  | CUG triplet repeat, RNA binding protein 2                                               | CUGBP2      | N36839      | 1,23                                                                                    | 0,17 | <b>2,3</b>  |
| 202289_s_at  | transforming, acidic coiled-coil containing protein 2                                   | TACC2       | NM_006997.1 | 1,34                                                                                    | 0,17 | <b>2,5</b>  |
| 202368_s_at  | translocation associated membrane protein 2                                             | TRAM2       | AI986461    | 1,2                                                                                     | 0,2  | <b>2,3</b>  |
| 202476_s_at  | tubulin, gamma complex associated protein 2                                             | TUBGCP2     | BF002130    | 1,14                                                                                    | 0,19 | <b>2,2</b>  |
| 202936_s_at  | SRY (sex determining region Y)-box 9 (campomelic dysplasia, autosomal sex-reversal)     | SOX9        | NM_000346.1 | 1,34                                                                                    | 0,35 | <b>2,5</b>  |
| 203723_at    | inositol 1,4,5-trisphosphate 3-kinase B                                                 | ITPKB       | NM_002221.1 | 1,34                                                                                    | 0,12 | <b>2,5</b>  |
| 203890_s_at  | death-associated protein kinase 3                                                       | DAPK3       | BF686824    | 1,54                                                                                    | 0,59 | <b>2,9</b>  |
| 203942_s_at  | MAP/microtubule affinity-regulating kinase 2                                            | MARK2       | NM_017490.1 | 2,35                                                                                    | 1,48 | <b>5,1</b>  |
| 203980_at    | fatty acid binding protein 4, adipocyte                                                 | FABP4       | NM_001442.1 | 2,68                                                                                    | 1,37 | <b>6,4</b>  |
| 204035_at    | secretogranin II (chromogranin C)                                                       | SCG2        | NM_003469.2 | 2,69                                                                                    | 0,35 | <b>6,5</b>  |
| 204476_s_at  | pyruvate carboxylase                                                                    | PC          | NM_022172.1 | 1,39                                                                                    | 0,39 | <b>2,6</b>  |
| 204595_s_at  | stanniocalcin 1                                                                         | STC1        | AI300520    | 1,81                                                                                    | 0,53 | <b>3,5</b>  |
| 205095_s_at  | ATPase, H+ transporting, lysosomal V0 subunit a isoform 1                               | ATP6V0A1    | NM_005177.1 | 2,34                                                                                    | 0,49 | <b>5,1</b>  |
| 205192_at    | mitogen-activated protein kinase kinase kinase 14                                       | MAP3K14     | NM_003954.1 | 1,19                                                                                    | 0,11 | <b>2,3</b>  |
| 206665_s_at  | BCL2-like 1                                                                             | BCL2L1      | NM_001191.1 | 3,51                                                                                    | 2,48 | <b>11,4</b> |
| 209160_at    | aldo-keto reductase family 1, member C3 (3-alpha hydroxysteroid dehydrogenase, type II) | AKR1C3      | AB018580.1  | 1,45                                                                                    | 0,25 | <b>2,7</b>  |
| 210457_x_at  | high mobility group AT-hook 1                                                           | HMGAI       | AF176039.1  | 1,82                                                                                    | 0,59 | <b>3,5</b>  |
| 211074_at    |                                                                                         |             | AF000381.1  | 1,54                                                                                    | 0,54 | <b>2,9</b>  |
| 211273_s_at  | T-box 1                                                                                 | TBX1        | AF012130.1  | 4,5                                                                                     | 1,58 | <b>22,6</b> |
| 211600_at    | protein tyrosine phosphatase, receptor type, O                                          | PTPRO       | U20489.1    | 2,4                                                                                     | 0,37 | <b>5,3</b>  |
| 211742_s_at  | ecotropic viral integration site 2B                                                     | EVI2B       | BC005926.1  | 1,37                                                                                    | 0,38 | <b>2,6</b>  |
| 212016_s_at  | polypyrimidine tract binding protein 1                                                  | PTBP1       | AA679988    | 1,88                                                                                    | 0,83 | <b>3,7</b>  |
| 212021_s_at  | antigen identified by monoclonal antibody Ki-67                                         | MKI67       | AU132185    | 1,19                                                                                    | 0,15 | <b>2,3</b>  |
| 212062_at    | ATPase, Class II, type 9A                                                               | ATP9A       | AB014511.1  | 1,39                                                                                    | 0,21 | <b>2,6</b>  |
| 212291_at    | homeodomain interacting protein kinase 1                                                | HIPK1       | AI393355    | 1,41                                                                                    | 0,49 | <b>2,7</b>  |
| 212574_x_at  | chromosome 19 open reading frame 6                                                      | C19orf6     | AC004528    | 3                                                                                       | 0,61 | <b>8,0</b>  |
| 212875_s_at  | chromosome 21 open reading frame 25                                                     | C21orf25    | AF001745    | 1,18                                                                                    | 0,15 | <b>2,3</b>  |
| 213248_at    | hypothetical protein LOC221362                                                          | LOC221362   | AL577024    | 1,48                                                                                    | 0,12 | <b>2,8</b>  |
| 214040_s_at  | gelsolin (amyloidosis, Finnish type)                                                    | GSN         | E675337     | 2,89                                                                                    | 1,27 | <b>7,4</b>  |
| 214216_s_at  | KIAA0217                                                                                | KIAA0217    | AW628686    | 3,06                                                                                    | 1,24 | <b>8,3</b>  |
| 214251_s_at  | nuclear mitotic apparatus protein 1                                                     | NUMA1       | AI337584    | 3,65                                                                                    | 1,42 | <b>12,6</b> |
| 214336_s_at  | coatomer protein complex, subunit alpha                                                 | COPA        | AI621079    | 2,08                                                                                    | 0,71 | <b>4,2</b>  |
| 215058_at    | hypothetical protein MGC24039                                                           | MGC24039    | AU144041    | 1,67                                                                                    | 0,53 | <b>3,2</b>  |
| 215660_s_at  | microtubule associated serine/threonine kinase 2                                        | MAST2       | AK025352.1  | 1,73                                                                                    | 0,56 | <b>3,3</b>  |
| 216971_s_at  | plectin 1, intermediate filament binding protein 500kDa                                 | PLEC1       | Z54367      | 4,58                                                                                    | 0,84 | <b>23,9</b> |
| 216997_x_at  | transducin-like enhancer of split 4 (E(spl) homolog, <i>Drosophila</i> )                | TLE4        | AL358975    | 1,77                                                                                    | 0,6  | <b>3,4</b>  |
| 218660_at    | dysferlin, limb girdle muscular dystrophy 2B (autosomal recessive)                      | DYSF        | NM_003494.1 | 1,13                                                                                    | 0,18 | <b>2,2</b>  |
| 219970_at    | PDZ domain protein GIPC2                                                                | GIPC2       | NM_017655.1 | 1,72                                                                                    | 0,26 | <b>3,3</b>  |
| 220092_s_at  | anthrax toxin receptor 1                                                                | ANTXR1      | NM_018153.1 | 1,3                                                                                     | 0,14 | <b>2,5</b>  |
| 222234_s_at  | hypothetical protein MGC3101                                                            | MGC3101     | AK022644.1  | 2,38                                                                                    | 1,2  | <b>5,2</b>  |
| 34478_at     | RAB11B, member RAS oncogene family                                                      | RAB11B      | X79780      | 2,6                                                                                     | 1,51 | <b>6,1</b>  |

(Comparison HMEC-1/ $\text{I}\kappa\text{B}\alpha$  -TNF- $\alpha$  vs HMEC-1/empty +TNF- $\alpha$  (Increase) less HMEC-1/ $\text{I}\kappa\text{B}\alpha$  -TNF- $\alpha$  vs HMEC-1/empty vector - TNF- $\alpha$  (Decrease) less HMEC-1/empty vector +TNF- $\alpha$  vs HMEC-1/empty vector -TNF- $\alpha$  (Decrease)).

\* SLR: signal log ratio (mean of three independent hybridization experiments).

1 Gene with more than one hit on the genechip.
